# Supplementary material for: Nitrogen concentrations in boreal and temperate tree tissues vary with tree age/size, growth rate and climate
Source: Copernicus journal article supplement (doi:10.5194/egusphere-2024-1794), 2024-07-30

BD ND NE

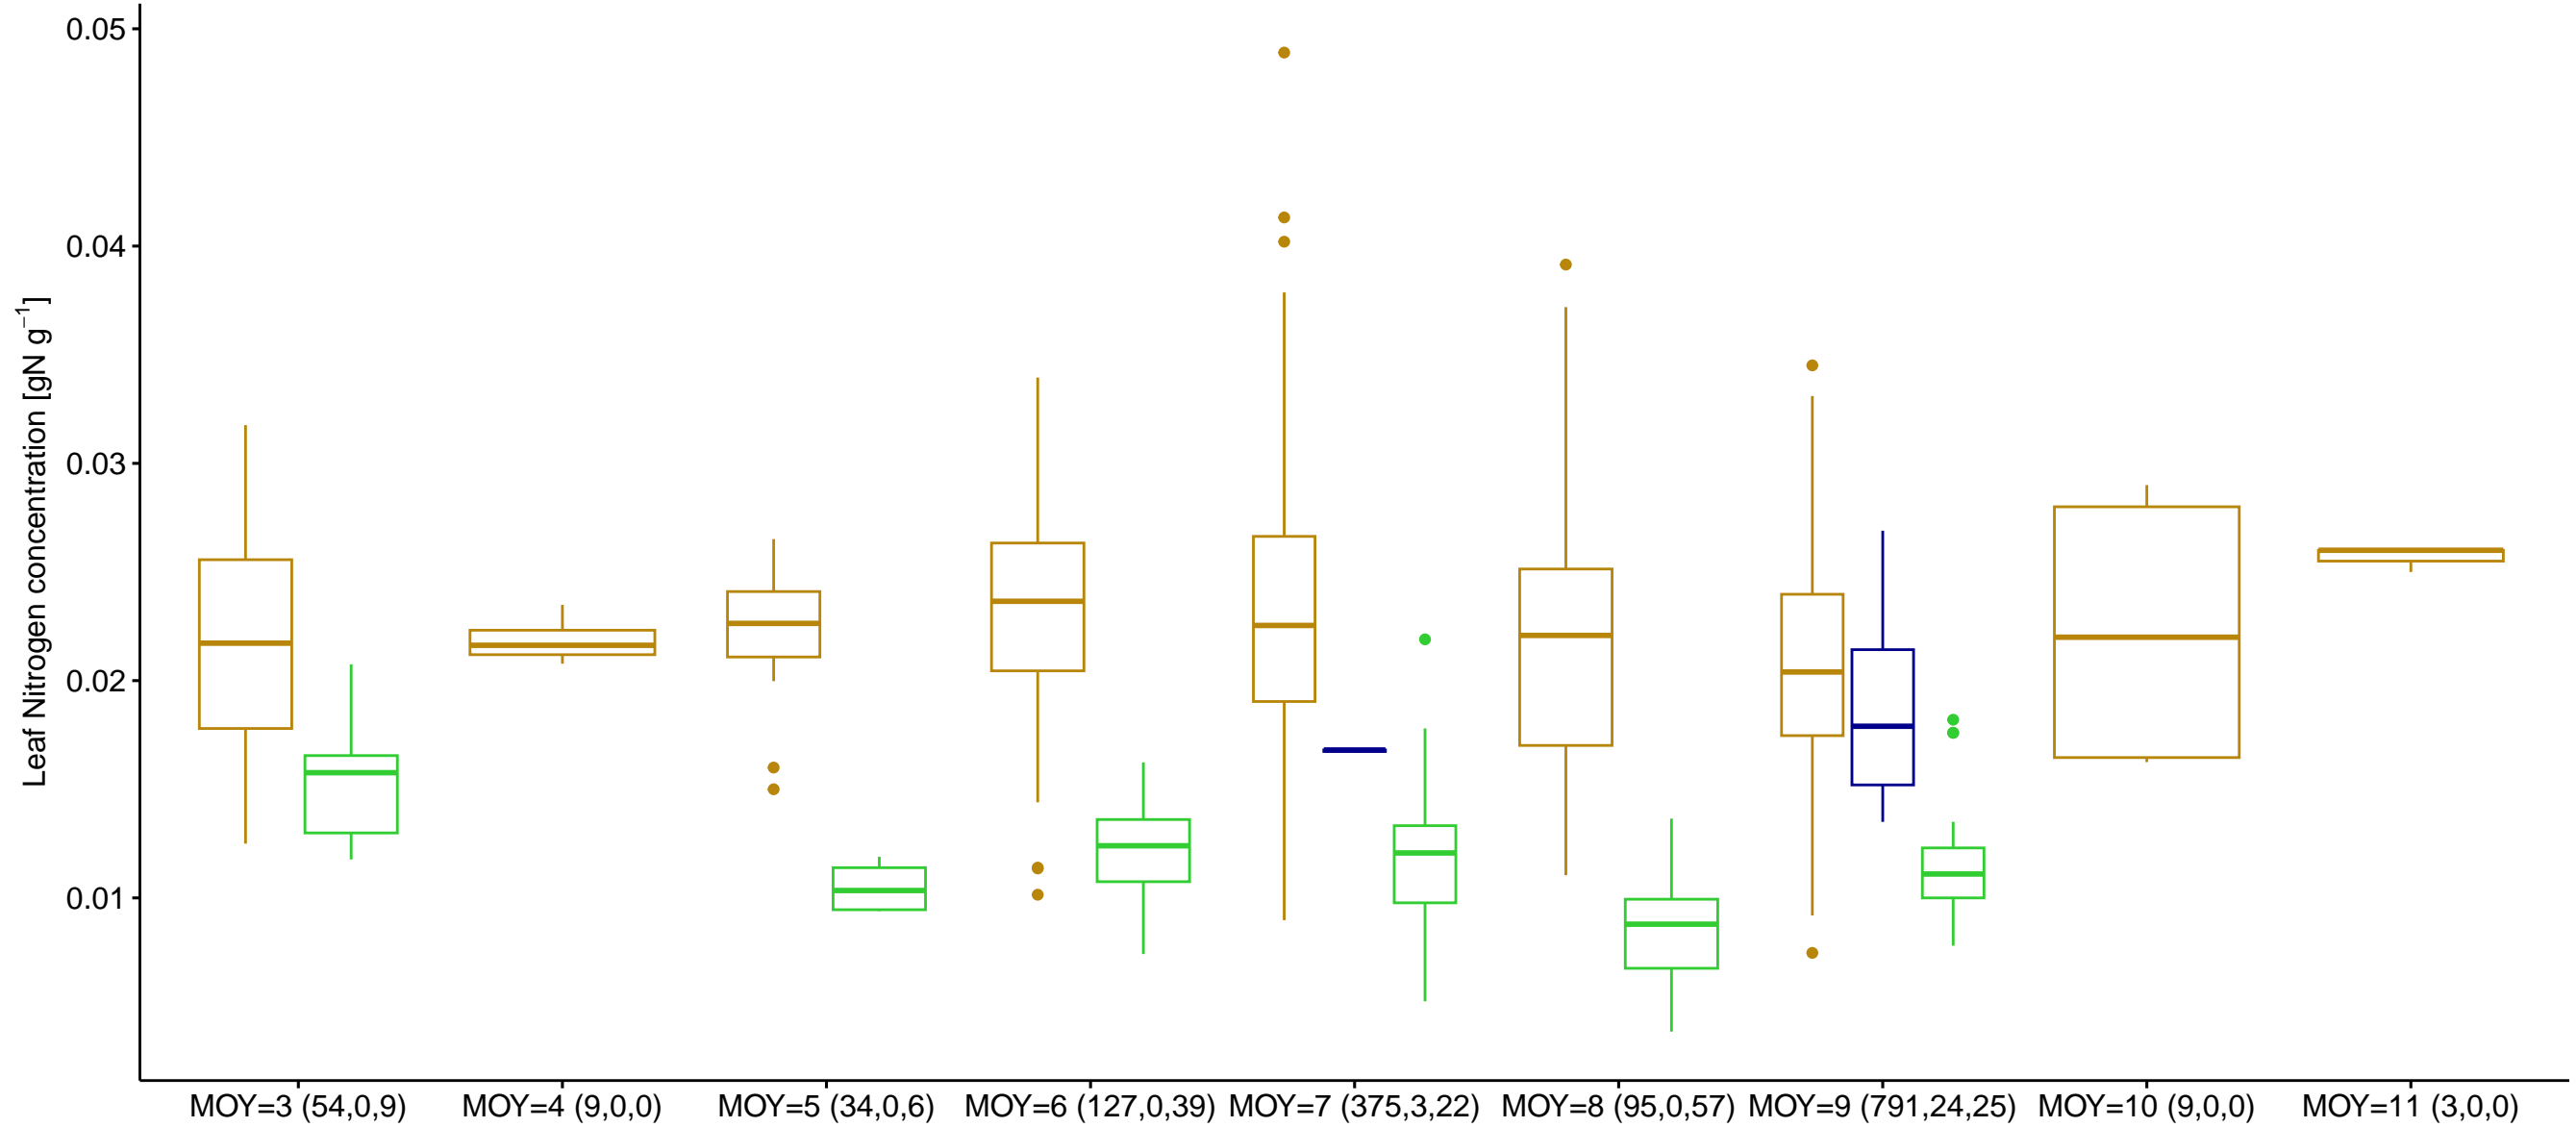

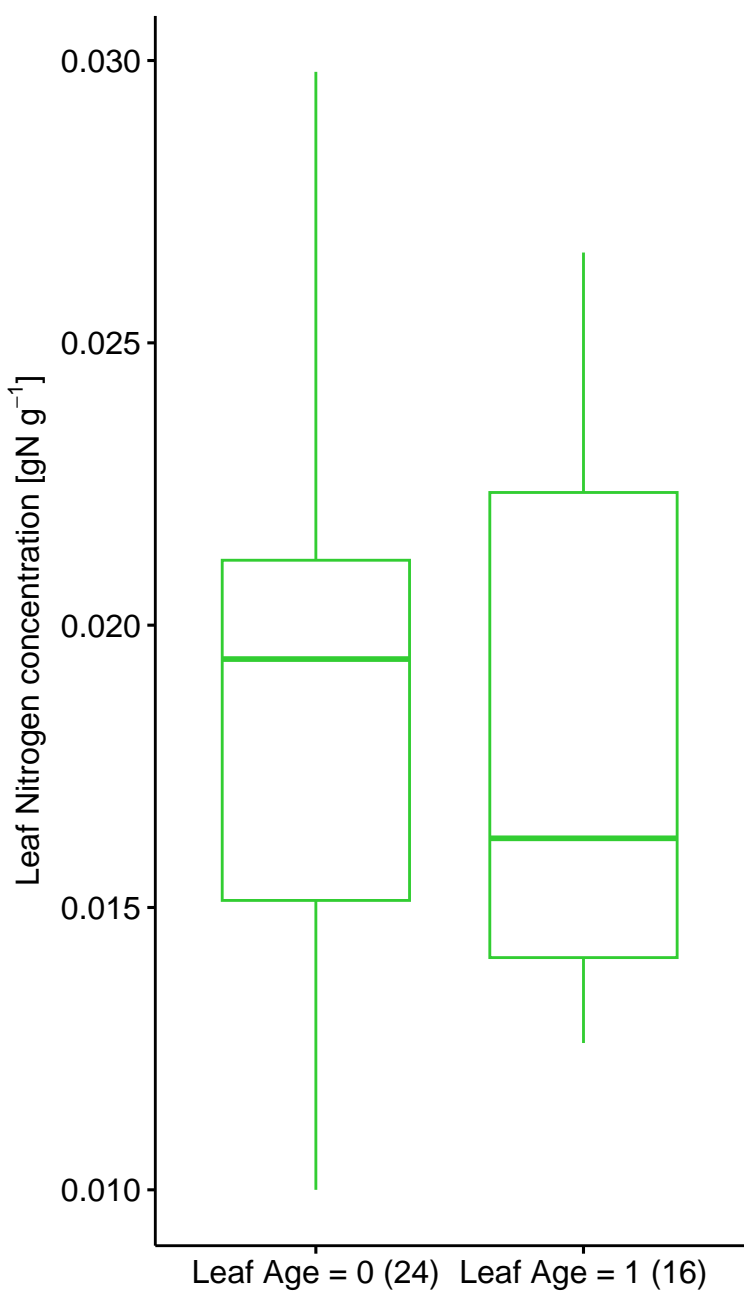

Supplement: Supplementary file [file egusphere-2024-1794-AC3-supplement.pdf]
